# Supplementary material for: Identification of genes directly responding to DLK1 signaling in Callipyge sheep
Source: PubMed Central journal article supplement (PMC5937834; doi:10.1186/s12864-018-4682-1), 2018-04-24

PARK7 / V5 epitope tag / DAPI

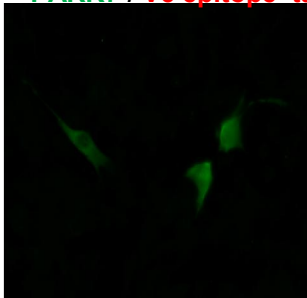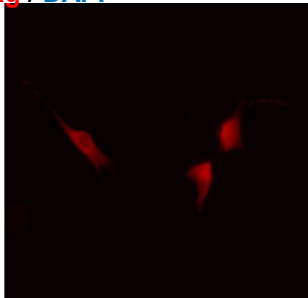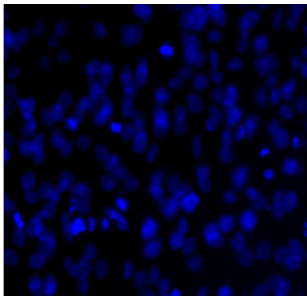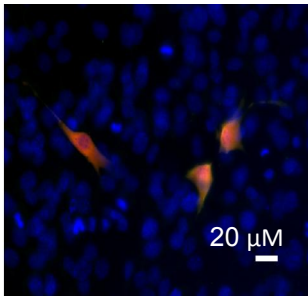

Supplement: 12864_2018_4682_MOESM7_ESM.pdf [file 12864_2018_4682_MOESM7_ESM.pdf]
